# Supplementary material
Source: publisher figshare collection journal article supplement (https://acs.figshare.com/ndownloader/files/13063970)
Supplement: Supplementary file 1 [file 13063970]

## Supporting Information

### Source-specific health risk analysis on particulate trace elements: Coal combustion and traffic emission as major contributors in wintertime Beijing

Ru-Jin Huang<sup>\*,†</sup>, Rui Cheng<sup>†</sup>, Miao Jing<sup>‡</sup>, Lu Yang<sup>†</sup>, Yongjie Li<sup>†</sup>, Qi Chen<sup>§</sup>, Yang Chen<sup>⊥</sup>, Jin Yan<sup>†</sup>, Chunshui Lin<sup>†,¶</sup>, Yunfei Wu<sup>∇</sup>, Renjian Zhang<sup>∇</sup>, Imad El Haddad<sup>#</sup>, Andre S. H. Prevot<sup>#</sup>, Colin D. O'Dowd<sup>¶</sup>, Junji Cao<sup>†</sup>

<sup>†</sup>Key Laboratory of Aerosol Chemistry and Physics, State Key Laboratory of Loess and Quaternary Geology, Institute of Earth and Environment, Chinese Academy of Sciences, Xi'an 710061, China

<sup>‡</sup>COE lab of Thermofisher Scientific Technology, Shanghai 201206, China

<sup>†</sup>Department of Civil and Environmental Engineering, Faculty of Science and Technology, University of Macau, Taipa 000000, Macau

<sup>§</sup>State Key Joint Laboratory of Environmental Simulation and Pollution Control, College of Environmental Sciences and Engineering, Peking University, Beijing 100871, China

<sup>⊥</sup>Chongqing Institute of Green and Intelligent Technology, Chinese Academy of Sciences, Chongqing 400714, China

<sup>¶</sup>School of Physics and Centre for Climate and Air Pollution Studies, Ryan Institute, National University of Ireland Galway, University Road, Galway H91CF50, Ireland

<sup>∇</sup>RCE-TEA, Institute of Atmospheric Physics, Chinese Academy of Sciences, Beijing 100029, China

<sup>#</sup>Laboratory of Atmospheric Chemistry, Paul Scherrer Institute (PSI), 5232 Villigen, Switzerland

\*corresponding authors, email: rujin.huang@ieecas.cn

The Supporting Information contains:

Number of figures: 6 (Figure S1-S6)

Number of tables: 7 (Table S1-S7)

Number of pages: 16

31 **Sampling site description**

32 The sampling site was in the Institute of Atmospheric Physics, Chinese Academy of Sciences,  
33 located between the third and fourth ring roads in the northwest Beijing. It is within a  
34 combination district of education, commercial, and residential units, a typical urban location  
35 in Beijing.

36

37 **Reagents and standard reference materials**

38 Milli-Q water ( $18.2 \text{ M}\Omega \text{ cm}^{-1}$ ; Millipore, Massachusetts, USA) was used for preparation of  
39 reagents and standards. Analytical grade reagents of  $\text{HNO}_3$  (JT Baker, Chemical Co.,  
40 Phillipsburg, NJ, USA),  $\text{HONH}_3\text{Cl}$  (98.0%, Sigma-Aldrich, USA),  $\text{CH}_3\text{COOH}$   
41 (Sigma-Aldrich),  $\text{CH}_3\text{COONH}_4$  (Sigma-Aldrich), perchloric acid solution (1.0 M,  
42 Sigma-Aldrich),  $\text{H}_2\text{O}_2$  (30 wt.% in  $\text{H}_2\text{O}$ , Aladdin, Shanghai, China), and HF (40 wt.% in  $\text{H}_2\text{O}$ ,  
43 J&K., Beijing, China) were used for extraction and digestion. The multi-element standards  
44 ([7697-37-2], in  $\text{HNO}_3$ ,  $20 \mu\text{g mL}^{-1}$ , SPEX CertiPrep, Avenue, Metuchen, USA) were  
45 obtained from Inorganic Venture for instrumental calibration of Inductively coupled plasma  
46 mass spectrometry (ICP-MS). The standard GBW07406 (GSS-6) used for recovery analysis  
47 and quality control was purchased from the National Research Center for Geoanalysis, China.

48 **Sequential extraction procedure**

49 A punch of filter (47 mm diameter) was used for each sample. Half of the punch was used for  
50 the sequential extraction and the other half for total digestion. After each extraction step (see  
51 Table S1), the extract was separated from the residues by centrifuging the mixture at 4500  
52 rpm for 15 min. The supernatant was carefully transferred to a Teflon beaker. The residual  
53 filter was rinsed with fresh extraction solution and then centrifuged again, and finally the  
54 supernatant was decanted into the same Teflon beaker. The combined supernatants were  
55 heated and purged to 1-2 mL, then diluted into 5 mL with 2%  $\text{HNO}_3$ . The extract was then  
56 filtered through a  $0.22 \mu\text{m}$  PTFE syringe filter (Sterlitech Corp., Kent, WA, USA) and stored  
57 at  $4 \text{ }^\circ\text{C}$  until ICP-MS analysis.

58 We used a four-step extraction procedure for the chemical fractionation of trace elements in  
59  $\text{PM}_{2.5}$ . In the fourth step, quartz filter can digest in the reagent mixture of  $\text{HNO}_3+\text{H}_2\text{O}_2+\text{HF}$  to  
60 give high extraction efficiency for the ‘residual fraction’ of trace elements, while Teflon filter  
61 cannot digest leading to potential underestimate. We also tested the extraction efficiencies  
62 using the same extraction procedure on Quartz and Teflon filter samples taken simultaneously.  
63 Our results show that extraction efficiencies of Teflon filter samples were only about 50% of  
64 that of quartz filter samples. A number of previous studies also used quartz filters for metal  
65 analysis in PM.<sup>1,2</sup> As for the background issue, the data reported in this study were corrected  
66 for the values from blank samples. Those elements of high background concentrations in  
67 quartz filters (e.g., K, Na, Mg, Al, Ca) were not discussed in our study.

68

69 **Quality assurance / quality control**

70 **The recovery of certified materials**

71 The certified material (GSS-6) was used to assess the accuracy of this method. The recoveries  
72 for total concentrations of the fourteen elements ranged from 81% to 112%, supporting that  
73 the extraction and measurement methods, as part of the quality control/quality assurance

74 protocol, were sufficient and effective. The detailed results of recoveries are listed in Table  
75 S2.

### 76 **Internal check of the recovery of this method**

77 Internal extraction efficiency of the sequential extraction was examined by comparing the  
78 sum of the concentration extracted in each fraction (i.e., F1, F2, F3, and F4) with the total  
79 concentration (TC) measured in the digested solution for each element. The recoveries ranged  
80 from 78% to 123% for these 14 elements, demonstrating the high extraction efficiency and  
81 reliability of this method (see Table S3).

### 82 **ICP-MS analysis**

83 The ICP-MS (iCAP Q, ThermoFisher Scientific, Waltham, MA, USA) was optimized daily. A  
84 seven-point calibration curve (i.e., 1, 2, 5, 10, 20, 50, 100  $\mu\text{g L}^{-1}$ ) was established for each  
85 targeted element, and the regression coefficients for all elements were  $>0.999$ . For the  
86 analysis,  $^{103}\text{Rh}$  and  $^{185}\text{Re}$  were added as internal standards at a concentration of 10  $\mu\text{g L}^{-1}$  in  
87 2%  $\text{HNO}_3$ . A spiked sample was analyzed for every 10 samples. Blank filter samples were  
88 extracted and analyzed following the same procedures. All data reported here were corrected  
89 for the field blanks. The accuracy was estimated by analyzing the reference material  
90 GBW07406 (GSS-6). The differences between the measured and certified values ranged from  
91 -19% to 12% for the fourteen elements, demonstrating a good accuracy of the method.

### 93 **PMF analysis**

94 The EPA PMF is one of the receptor models that the US EPA's Office of Research and  
95 Development has developed. PMF was used to identify and quantify the main sources of these  
96 elements. The PMF receptor model has been widely used for  $\text{PM}_{2.5}$  source apportionment. In  
97 this study, the concentrations and uncertainties of fourteen trace elements were included in the  
98 PMF 5.0. If the concentration is less than or equal to the method detection limit (MDL)  
99 provided, the uncertainty (Unc) is calculated using the following equation <sup>3,4</sup>

$$100 \quad \text{Unc} = \frac{5}{6} \times \text{MDL} \quad (1)$$

101 If the concentration is greater than the *MDL*, the uncertainty is then calculated as the detection  
102 limits (MDL) and a relative error (5%) summed in quadrature,

$$103 \quad \text{Unc} = \sqrt{(\text{Error Fraction} \times \text{concentration})^2 + (\text{MDL})^2} \quad (2)$$

104  
105 The model is a multivariate factor analysis and descriptive model, providing a solution that  
106 minimizes an objective function  $Q$  based on uncertainty of each measurement. In this study,  
107 the PMF solutions from 3 to 6 factors were examined, and the 4-factor solution is selected as  
108 it provides the most interpretable profiles and minimal  $Q$  value. In Figure S4 we show the  
109 correlation ( $R^2$ ) of each element with each source identified by PMF. From the figure, we can  
110 see that relatively high correlation coefficients are obtained between the source markers and a  
111 specific source. For example, coal combustion is closely correlated with As ( $R^2=0.83$ ), Cd  
112 ( $R^2=0.91$ ) and Pb ( $R^2=0.87$ ). Traffic-related emission is highly correlated with Ni ( $R^2=0.90$ )  
113 and Ba ( $R^2=0.90$ ). Oil combustion shows a high  $R^2$  value with V (0.86) and dust source is

114 highly correlated with Ti (0.96) and Fe (0.81). Figure S5a, b and c show the source profiles  
 115 resolved from the PMF model with 3, 5 and 6 factors, respectively. In the 3-factor solution  
 116 (Figure S5a), factors 1 and 3 are likely traffic-related emission and coal combustion,  
 117 respectively. However, factor 2 is a mixture of multiple sources, explaining a major fraction  
 118 of the variability of both Ti and V, which typically arise from distinct sources: crustal material  
 119 and oil combustion, respectively. The 4-factor solution enabled the separation of these two  
 120 sources. In the 5-factor solution (Figure S5b), factor 2, factor 3 and factor 5 could be  
 121 identified as dust, oil combustion and coal combustion, respectively. However, factor 1 and  
 122 factor 4 seem to be a split from traffic-related emissions, potentially related to different, but  
 123 unknown processes. Similar to the 5-factor solution, in the 6-factor solution (Figure S5c), coal  
 124 combustion was split into factor 4 and factor 6 while traffic-related emission was split into  
 125 factor 2 and factor 5. Therefore, the 4-factor solution was chosen as the optimal representation  
 126 of our dataset. Figure S5d shows the value of goodness-of-fit parameter  $Q$  corresponding to  
 127 the solution of different number of factors. It indicates that as the number of factors increases  
 128 from 3 to 6, the  $Q/Q_{exp}$  value decreases. Considering the source profiles resolved from PMF  
 129 analysis and the  $Q/Q_{exp}$  values, we chose the 4-factor solution.

### 130 Health risk assessment

131 According to the study by Volckens and Leith, the deposition efficiency of particles of size  $i$   
 132 that penetrate into the lung can be calculated as follows:<sup>5</sup>

$$133 \quad Ei = -0.081 + 0.23 \cdot \ln(dp)^2 + 0.23 \cdot \sqrt{dp} \quad (3)$$

134  $Ei$  is the deposition fraction of particles of size  $i$  that penetrate into the lung, which is a  
 135 complicated function of several deposition mechanisms that include impaction, interception,  
 136 sedimentation, diffusion, and electric force. In this interpolation equation  $Ei$  depends on the  
 137 aerodynamic particle diameter ( $dp$ ) and can be used to estimate deposition to the lungs for  
 138 particles between 0.01 and 10  $\mu\text{m}$  in diameter.<sup>5</sup>

139 The winter days from 1 Nov 2013 to 31 Jan 2014 in Beijing were classified into three periods  
 140 according to the  $\text{PM}_{2.5}$  concentrations: low pollution days ( $\leq 75 \mu\text{g m}^{-3}$ , 49 days), moderate  
 141 pollution days ( $75\text{-}170 \mu\text{g m}^{-3}$ , 30 days), and severe pollution days ( $\geq 170 \mu\text{g m}^{-3}$ , 13 days).  
 142 The average concentrations of bioavailable fraction (exchangeable fraction (F1) and reducible  
 143 fraction (F2)) of particulate-bound trace elements were used for calculation of exposure-point  
 144 concentration (C). The exposure-point concentration (C) of individual elements in winter  
 145 2014 in Beijing was calculated following Eq. (4),

$$146 \quad C = \frac{(F1 + F2)_{\text{clean}} \times 49 + (F1 + F2)_{\text{moderate}} \times 30 + (F1 + F2)_{\text{severe}} \times 13}{90} \quad (4)$$

147 where the values of F1 and F2 are the average concentrations in exchangeable fraction and  
 148 reducible fraction for each measured element during low, moderate and severe pollution days  
 149 from 1<sup>st</sup> to 25<sup>th</sup> January 2014, respectively.

150 The carcinogenic and non-carcinogenic risks by airborne metals via direct inhalation of  $\text{PM}_{2.5}$   
 151 were calculated using US Environmental Protection Agency (US EPA) human health risk  
 152 assessment models (US EPA 2009),<sup>6</sup> which mainly involve exposure assessment and risk  
 153 characterization. The methodology has been used in previous studies.<sup>1,2</sup>

154 Sensitive local residents were divided into two groups (i.e., children and adults). The

155 inhalation exposure concentration (EC), hazard quotient (HQ) for non-cancer risk, and  
 156 carcinogenic risks (CR) by a toxic element in PM<sub>2.5</sub> were calculated following Eqs. (5-7)

$$157 \quad EC = \frac{C \times Ei \times ET \times EF \times ED}{ATn} \quad (5)$$

$$158 \quad HQ = \frac{EC}{RfC \times 1000 \mu\text{g mg}^{-1}} \quad (6)$$

$$159 \quad CR = IUR \times EC \quad (7)$$

160 where ET is the exposure time (24 h/day), EF is the exposure frequency (180 day/year), ED is  
 161 the exposure duration (6 years for children and 24 years for adults), ATn is the averaging time  
 162 (for non-carcinogens ATn = ED × 365 day/year × 24 h/day, and for carcinogens ATn = 70 year  
 163 × 365 day/year × 24 h/day), RfC is the inhalation reference concentration (mg m<sup>-3</sup>) and IUR is  
 164 the inhalation unit risk (μg m<sup>-3</sup>)<sup>-1</sup>). The RfC, IUR and default values for exposure were  
 165 obtained from the user's guide and technical background document for the U.S. EPA region 9  
 166 regional screening level tables (US EPA, 2013).<sup>7</sup> Elements that induce non-carcinogenic but  
 167 toxic effects are As, Cd, Co, Cr (VI), Mn, Ni and V. The RfC is used for the non-carcinogenic  
 168 risk characterization. Elements that induce carcinogenic effects include As, Cd, Cr (VI), Ni,  
 169 Co, and Pb. The IUR is used for the carcinogenic risk characterization.

170 The carcinogenic risk (CR) is the probability of an individual developing any type of cancer  
 171 from lifetime exposure to carcinogenic hazards; the acceptable risk range is 1.0 × 10<sup>-6</sup>  
 172 according to the US EPA risk management guidelines (2009).<sup>6</sup> The sum of hazard quotient  
 173 (HQ) below the precautionary level of 1 suggests that there is no significant risk of  
 174 non-carcinogenic effects, while their values above 1 indicate that there is a chance of  
 175 non-carcinogenic effects occurring, with a probability that tends to increase as the value of  
 176 HQ increases (US EPA 2013).<sup>7</sup>

177 The carcinogenic and non-carcinogenic health risks of the four emission sources (oil  
 178 combustion, dust, traffic-related and coal combustion) were assessed. The sum of  
 179 carcinogenic risk (CR) of carcinogenic elements is used to assess the total carcinogenic risk  
 180 of each emission source. For non-carcinogenic risks, the sum of hazard quotient (HQ) of  
 181 non-carcinogenic elements is used to assess the overall non-carcinogenic effects of emission  
 182 source.<sup>1,2</sup> The carcinogenic risk and non-carcinogenic risk of each source (CR<sub>s</sub> and HQ<sub>s</sub>) is  
 183 calculated using Eqs. (8) and (9), respectively,

$$184 \quad CR_s = \sum (CR_i \times RC_i) \quad (i= \text{As, Cd, Cr (VI), Ni, Co, and Pb}) \quad (8)$$

$$185 \quad HQ_s = \sum (HQ_i \times RC_i) \quad (i= \text{As, Cd, Co, Cr (VI), Mn, Ni and V}) \quad (9)$$

186 RC<sub>i</sub> is the relative contribution of emission source to individual elements resolved from  
 187 source profiles (Figure S3).

188 The fraction (F<sub>car(s)</sub>) of CR<sub>s</sub> of each source in the total carcinogenic risk is calculated using Eq.  
 189 (10), while the fraction (F<sub>non(s)</sub>) of HQ<sub>s</sub> of each source in the total non-carcinogenic risk is  
 190 calculated using Eq. (11),

$$191 \quad F_{car(s)} = \frac{CR_s \times RC_s}{\sum (CR_s \times RC_s)} \quad (S= \text{oil combustion, dust, traffic-related and coal combustion}) \quad (10)$$

192 
$$F_{\text{non}(s)} = \frac{HQ_s \times RC_s}{\sum (HQ_s \times RC_s)} \quad (S = \text{oil combustion, dust, traffic-related and coal combustion}) \quad (11)$$

193  $RC_s$  is contribution of each emission source to total mass of measured elements in source  
194 apportionment (Figure 3a in main text).

195 According to the guideline provided by U.S. EPA, Cr (VI) and Cr (III) are classified as Group  
196 A (human carcinogens) and Group D (not classifiable for human carcinogenicity),  
197 respectively. However, the total concentrations of Cr were obtained by the sequential  
198 extraction method in this study. As the concentration ratio of Cr (VI) to Cr (III) in the  
199 atmosphere was reported to be about 1:6, the concentration of Cr (VI) was approximated to be  
200 one seventh of the total Cr concentration for the carcinogenic risk calculation.<sup>8,9</sup>

201

202 **Table S1.** Chemical fractions, reagents and operational conditions during the sequential  
 203 extraction procedure in this study.

| Metal fraction                                                       | Reagent                                                                                                                          | Experimental conditions                                                                                                                                      |
|----------------------------------------------------------------------|----------------------------------------------------------------------------------------------------------------------------------|--------------------------------------------------------------------------------------------------------------------------------------------------------------|
| Fraction 1. Soluble and exchangeable metals                          | 15 mL Milli-Q water (pH=7.4)                                                                                                     | agitation on a shaker at room temperature for 3 hours                                                                                                        |
| Fraction 2. Carbonates, oxides and reducible metals                  | 10 mL 0.25 M NH <sub>2</sub> OH HCl at pH=2.0                                                                                    | agitation on a shaker at room temperature for 5 hours                                                                                                        |
| Fraction 3. Bound to organic matter, oxidisable and sulphidic metals | 7.5 mL H <sub>2</sub> O <sub>2</sub> 30 % + 7.5 mL H <sub>2</sub> O <sub>2</sub> 30% + 15 mL 2.5 M NH <sub>4</sub> AcO at pH=3.0 | agitation on a shaker at 95 °C until near dryness + agitation on a shaker at 95 °C until near dryness + agitation on a shaker at room temperature for 90 min |
| Fraction 4. Residual metals                                          | 4 mL HNO <sub>3</sub> + 2 mL H <sub>2</sub> O <sub>2</sub> + 0.2 mL HF                                                           | 10 min, 500 W, 130 °C; 5 min, 500 W, 150 °C; 5 min, 500 W, 180 °C; 15 min, 500 W, 200 °C                                                                     |

204 **Table S2.** The recovery of each element measured in standard sample GBW07406 (GSS-6)  
 205 following the same extraction procedure.

| $\mu\text{g L}^{-1}$ | Certified value | Measured value | Recovery % |
|----------------------|-----------------|----------------|------------|
| Ti                   | 1756.0          | 1615.5         | 92.5       |
| V                    | 52.0            | 45.8           | 88.1       |
| Cr                   | 30.0            | 31.5           | 105.3      |
| Mn                   | 580.0           | 551.0          | 95.9       |
| Fe                   | 24400.0         | 23668.0        | 97.8       |
| Co                   | 3.0             | 3.2            | 104.9      |
| Ni                   | 21.2            | 22.5           | 106.7      |
| Cu                   | 156.0           | 142.0          | 91.7       |
| Zn                   | 38.8            | 40.0           | 103.4      |
| As                   | 88.0            | 75.7           | 86.3       |
| Sr                   | 15.6            | 12.6           | 81.9       |
| Cd                   | 0.15            | 0.06           | 112.1      |
| Ba                   | 47.2            | 51.0           | 108.8      |
| Pb                   | 125.6           | 113.0          | 90.8       |

206

207

208

209 **Table S3.** The internal recovery of each element measured in PM<sub>2.5</sub> samples using the same  
 210 extraction procedure.

| Element | Average Internal Recovery % |
|---------|-----------------------------|
| Ti      | 78.4 ± 12.8                 |
| V       | 81.4 ± 13.4                 |
| Cr      | 123.3 ± 19.0                |
| Mn      | 93.5 ± 15.0                 |
| Fe      | 85.1 ± 14.5                 |
| Co      | 77.5 ± 8.7                  |
| Ni      | 101.3 ± 9.7                 |
| Cu      | 92.8 ± 9.3                  |
| Zn      | 120.0 ± 27.7                |
| As      | 84.4 ± 14.7                 |
| Sr      | 80.3 ± 11.7                 |
| Cd      | 101.1 ± 26.2                |
| Ba      | 104.3 ± 9.5                 |
| Pb      | 120.3 ± 14.6                |

211 **Table S4.** The concentrations of trace elements during low pollution days, moderate pollution  
 212 days, severe pollution days and entire sampling period. These abbreviations, such as L, M and  
 213 S represent the concentrations of particulate-bound trace elements in low pollution days,  
 214 moderate pollution days and severe pollution days, respectively.

| ng m <sup>-3</sup> | Low           | Moderate      | Severe         | Full period   | M/L  | S/L |
|--------------------|---------------|---------------|----------------|---------------|------|-----|
| Ti                 | 51.6 ± 14.7   | 59.0 ± 5.8    | 66.6 ± 20.4    | 56.6 ± 13.4   | 1.14 | 1.3 |
| V                  | 2.2 ± 0.7     | 4.7 ± 1.6     | 5.4 ± 2.0      | 3.7 ± 2.0     | 2.1  | 2.5 |
| Cr                 | 12.5 ± 3.1    | 17.1 ± 4.3    | 20.3 ± 1.2     | 15.4 ± 5.1    | 1.4  | 1.6 |
| Mn                 | 22.6 ± 6.6    | 46.1 ± 13.1   | 77.8 ± 21.1    | 40.9 ± 22.1   | 2.0  | 3.4 |
| Fe                 | 536.7 ± 146.8 | 946.1 ± 315.3 | 1080.3 ± 322.6 | 771.8 ± 297.7 | 1.8  | 2.0 |
| Co                 | 0.6 ± 0.1     | 0.9 ± 0.2     | 1.3 ± 0.4      | 0.8 ± 0.3     | 1.5  | 2.2 |
| Ni                 | 52.6 ± 16.6   | 59.2 ± 17.4   | 67.4 ± 9.4     | 57.8 ± 17.6   | 1.1  | 1.3 |
| Cu                 | 35.2 ± 6.4    | 59.1 ± 10.6   | 77.4 ± 20.6    | 53.5 ± 19.5   | 1.7  | 2.2 |
| Zn                 | 73.9 ± 19.6   | 188.4 ± 68.4  | 427.9 ± 73.1   | 183.6 ± 138.0 | 2.5  | 5.8 |
| As                 | 4.5 ± 1.1     | 9.5 ± 2.8     | 32.9 ± 13.0    | 11.0 ± 9.4    | 2.1  | 7.3 |
| Sr                 | 14.0 ± 4.3    | 17.6 ± 7.4    | 20.4 ± 8.0     | 16.4 ± 6.9    | 1.3  | 1.5 |
| Cd                 | 0.8 ± 0.3     | 2.0 ± 0.8     | 5.6 ± 2.3      | 2.0 ± 1.3     | 2.5  | 7.0 |
| Ba                 | 87.8 ± 25.2   | 119.8 ± 23.0  | 129.1 ± 29.3   | 109.4 ± 27.6  | 1.4  | 1.5 |
| Pb                 | 65.3 ± 20.1   | 147.8 ± 46.9  | 284.8 ± 94.4   | 138.1 ± 69.9  | 2.3  | 4.4 |

215

216



217 **Table S5.** The calculated EC, RfC and IUR.

| Element               | Concentration<br>(ng m <sup>-3</sup> ) | Exposure concentration (ng<br>m <sup>-3</sup> ) |          | RFC<br>(mg m <sup>-3</sup> ) | IUR<br>(μg m <sup>-3</sup> ) <sup>-1</sup> |
|-----------------------|----------------------------------------|-------------------------------------------------|----------|------------------------------|--------------------------------------------|
|                       |                                        | Children                                        | Adults   |                              |                                            |
| As (Inorganic)        | 7.53E+00                               | 2.61E+00                                        | 2.61E+00 | 1.50E-05                     |                                            |
| Cd (Diet /<br>water)  | 1.87E+00                               | 6.48E-01                                        | 6.48E-01 | 1.00E-05                     |                                            |
| Co                    | 5.01E-01                               | 1.74E-01                                        | 1.74E-01 | 6.00E-06                     |                                            |
| Cr (VI)               | 4.84E-01                               | 1.68E-01                                        | 1.68E-01 | 1.00E-04                     |                                            |
| Mn (Diet)             | 3.10E+01                               | 1.08E+01                                        | 1.08E+01 | 5.00E-05                     |                                            |
| Ni (refinery<br>dust) | 2.60E+01                               | 9.03E+00                                        | 9.03E+00 | 1.40E-05                     |                                            |
| V                     | 2.39E+00                               | 8.30E-01                                        | 8.30E-01 | 1.00E-04                     |                                            |
| As (Inorganic)        | 7.53E+00                               | 2.24E-01                                        | 8.96E-01 |                              | 4.30E-03                                   |
| Cd (Diet /<br>water)  | 1.87E+00                               | 5.55E-02                                        | 2.22E-01 |                              | 1.80E-03                                   |
| Co                    | 5.01E-01                               | 1.49E-02                                        | 5.96E-02 |                              | 9.00E-03                                   |
| Cr (VI)               | 4.84E-01                               | 1.44E-02                                        | 5.76E-02 |                              | 8.40E-02                                   |
| Ni (refinery<br>dust) | 2.60E+01                               | 7.74E-01                                        | 3.10E+00 |                              | 2.40E-04                                   |
| Pb (acetate)          | 1.06E+02                               | 3.16E+00                                        | 1.26E+01 |                              | 8.00E-05                                   |

218 **Table S6.** Carcinogenic and non-carcinogenic risks resulted from trace elements via  
219 inhalation exposure to PM<sub>2.5</sub> in winter 2014 in Beijing.

| Metal                 | Carcinogenic (CR) |          | Non-Carcinogenic (HQ) |          |
|-----------------------|-------------------|----------|-----------------------|----------|
|                       | Children          | Adults   | Children              | Adults   |
| As (Inorganic)        | 9.64E-07          | 3.85E-06 | 1.74E-01              | 1.74E-01 |
| Cd (Diet /<br>water)  | 9.99E-08          | 4.00E-07 | 6.48E-02              | 6.48E-02 |
| Co                    | 1.34E-07          | 5.37E-07 | 2.90E-02              | 2.90E-02 |
| Cr (VI)               | 1.21E-06          | 4.84E-06 | 1.68E-03              | 1.68E-03 |
| Mn (Diet)             |                   |          | 2.15E-01              | 2.15E-01 |
| Ni (refinery<br>dust) | 1.86E-07          | 7.43E-07 | 6.45E-01              | 6.45E-01 |
| V                     |                   |          | 8.30E-03              | 8.30E-03 |
| Pb (acetate)          | 2.53E-07          | 1.01E-06 |                       |          |

|     |          |          |          |          |
|-----|----------|----------|----------|----------|
| Sum | 2.85E-06 | 1.14E-05 | 1.14E+00 | 1.14E+00 |
|-----|----------|----------|----------|----------|

220 **Table S7.** Carcinogenic and non-carcinogenic risks resulted from four emission sources via  
 221 inhalation exposure to PM<sub>2.5</sub> in winter 2014 in Beijing.

| Sources         | Carcinogenic (CR) |          | Non-Carcinogenic (HQ) |          |
|-----------------|-------------------|----------|-----------------------|----------|
|                 | Children          | Adults   | Children              | Adults   |
| Oil combustion  | 4.55E-08          | 1.82E-07 | 6.52E-02              | 6.52E-02 |
| Traffic-related | 1.21E-06          | 4.84E-06 | 6.89E-01              | 6.89E-01 |
| Coal combustion | 1.33E-06          | 5.31E-06 | 3.29E-01              | 3.29E-01 |
| Dust            | 2.62E-07          | 1.05E-06 | 5.48E-02              | 5.48E-02 |

222

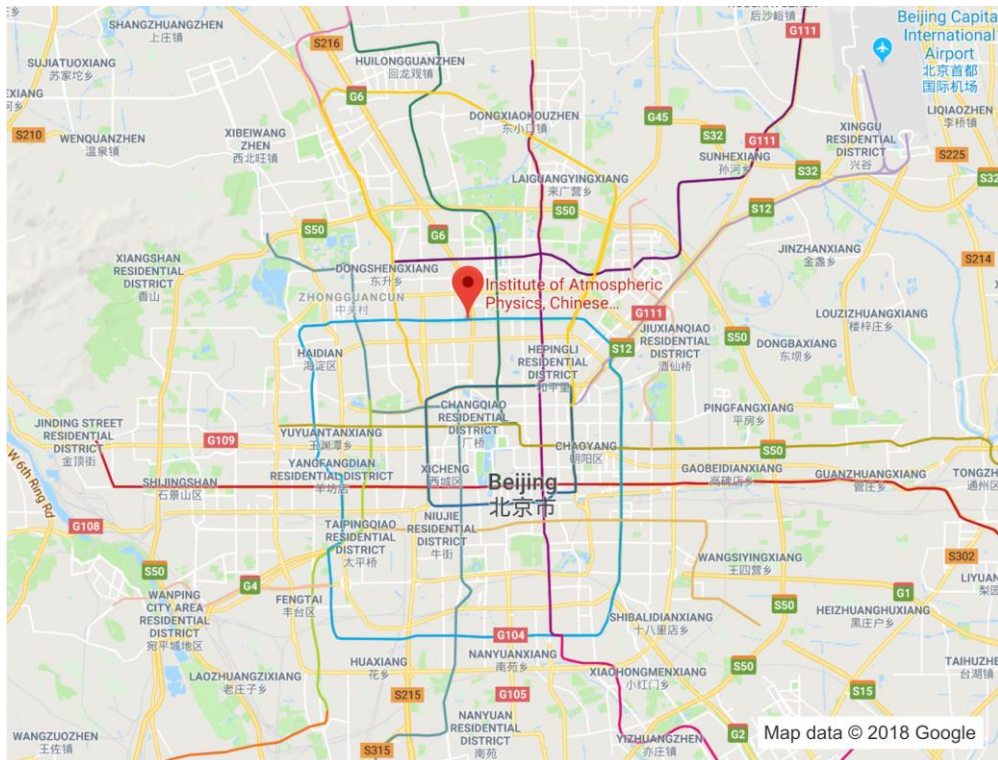

223

224

Figure S1. The sampling site in Beijing (<http://www.google.com>).

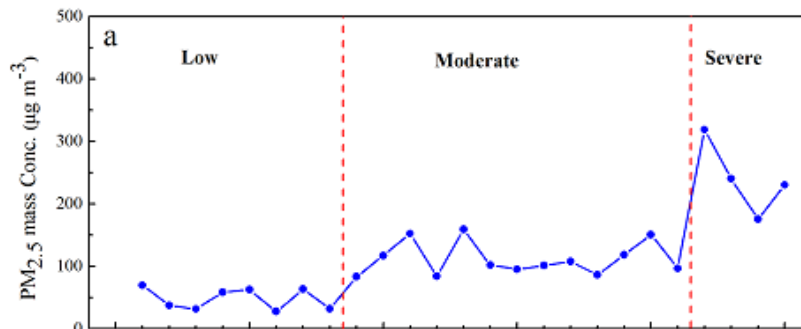

225

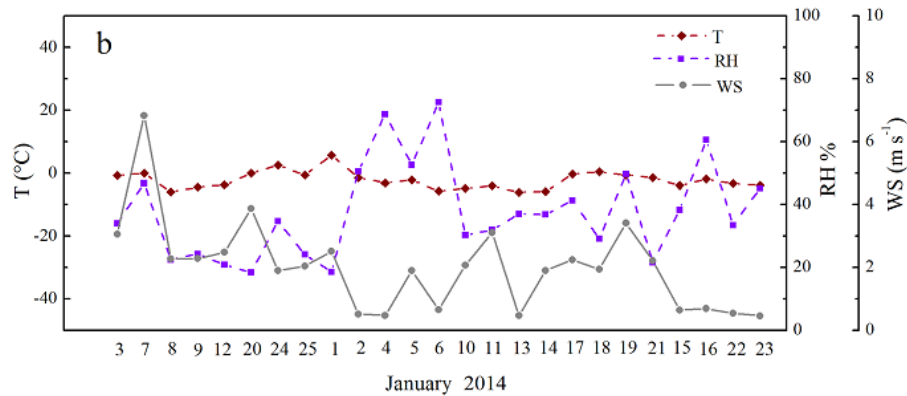

226

227 **Figure S2.** Daily PM<sub>2.5</sub> mass concentrations (a) and meteorological data (b) (T = temperature,

228 RH = relative humidity and WS = wind speed) during the sampling period.

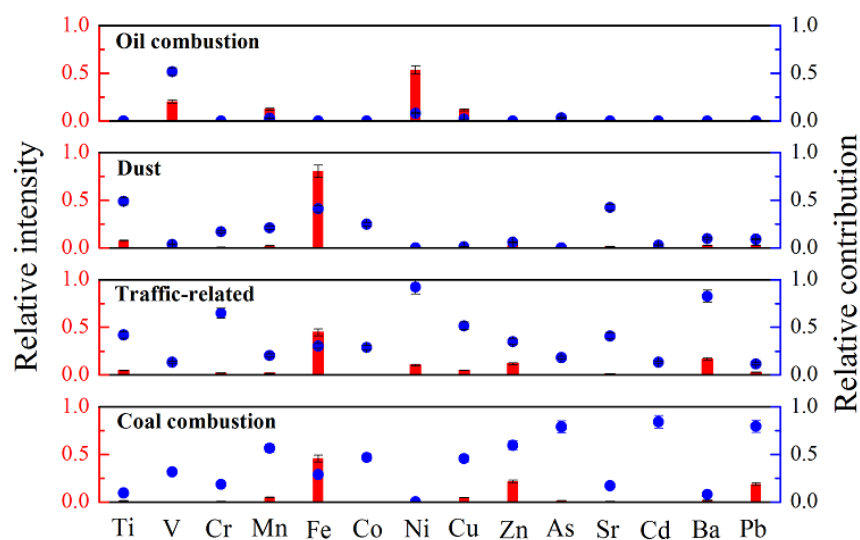

230

231 **Figure S3.** Source profiles resolved from the PMF model. The bars (left y axis) represent the  
 232 relative intensity of element to each factor in  $\text{ng m}^{-3}$ , circles (right y axis) represent the  
 233 fraction of the total predicted concentration for a given element.

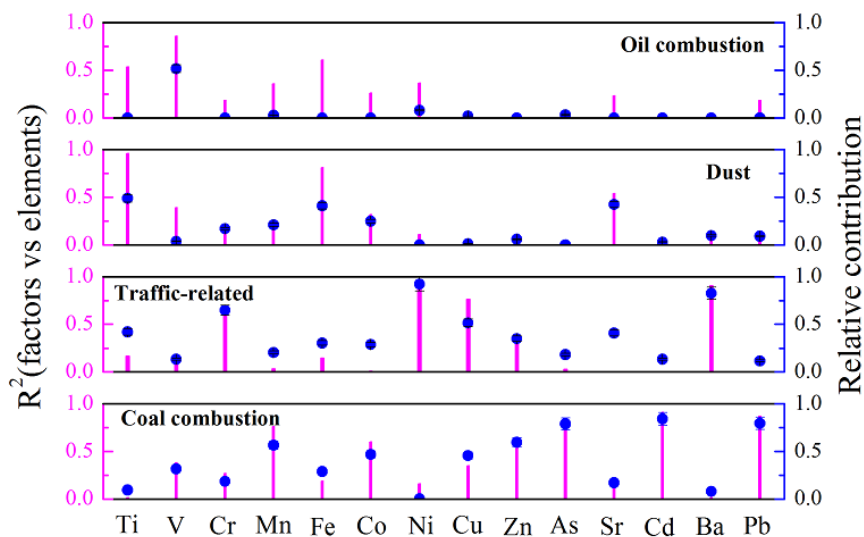

234

235 **Figure S4.** The correlations of each element with each source identified by the PMF model.  
 236 The bars (left y axis) represent the  $R^2$  (factors vs elements), while circles (right y axis)  
 237 represent the contribution of the total predicted concentration for a given element

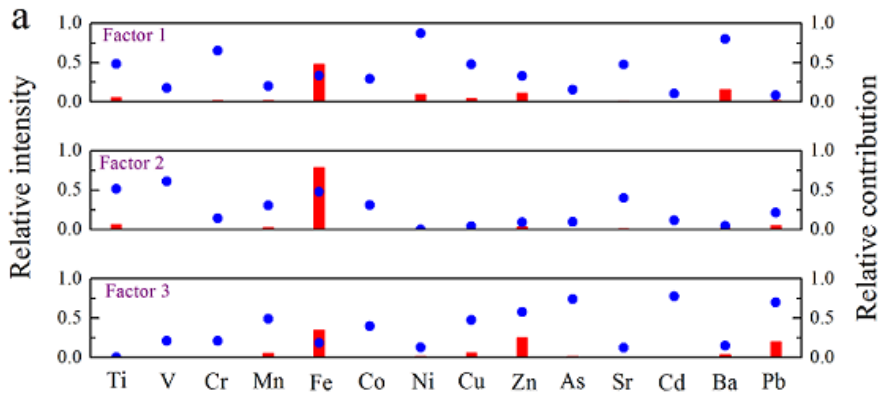

238

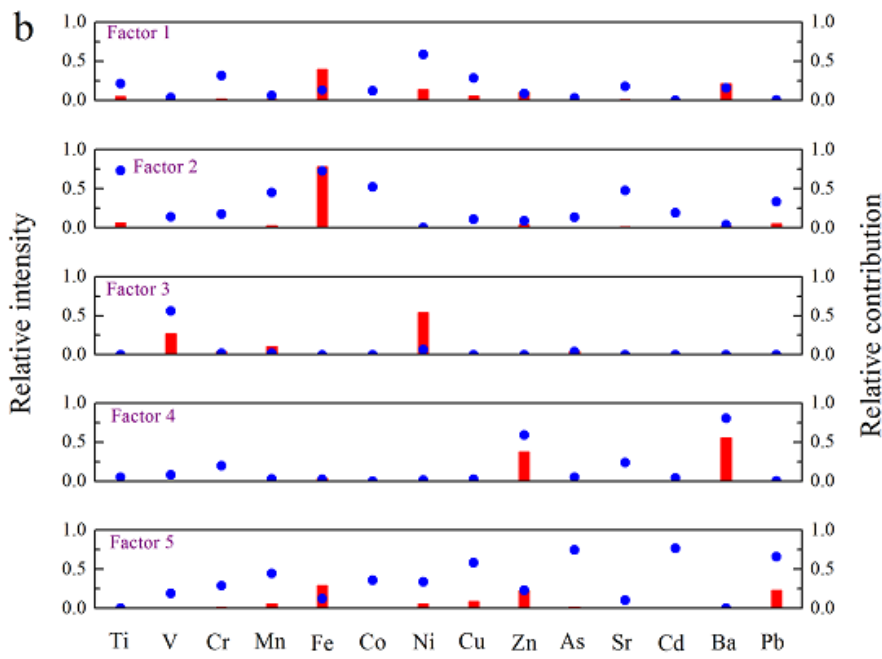

239

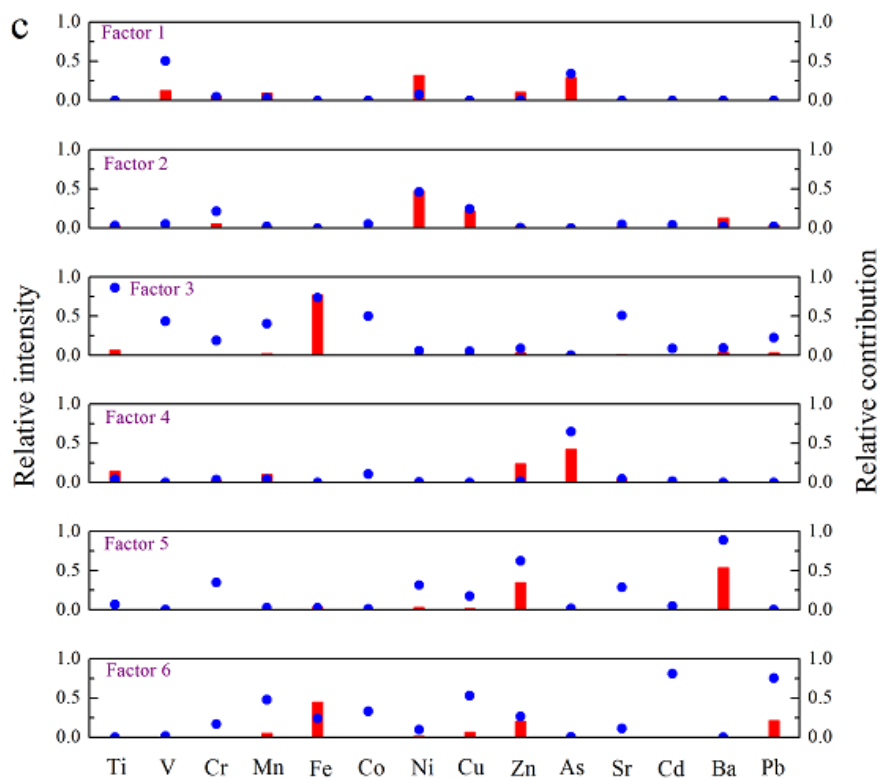

240

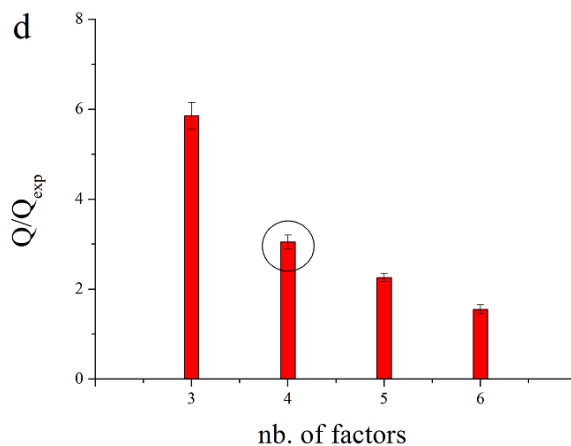

241

242 **Figure S5.** Source profiles resolved from the PMF model with 3 factors (a), 5 factors (b) and  
 243 6 factors (c), respectively. The bars (left y axis) represent the relative intensity of element to  
 244 each factor in  $\text{ng m}^{-3}$ , circles (right y axis) represent the fraction of the total predicted  
 245 concentration for a given element. The value of goodness-of-fit parameter  $Q$  (d) corresponded  
 246 to the source profiles of different number of factors.

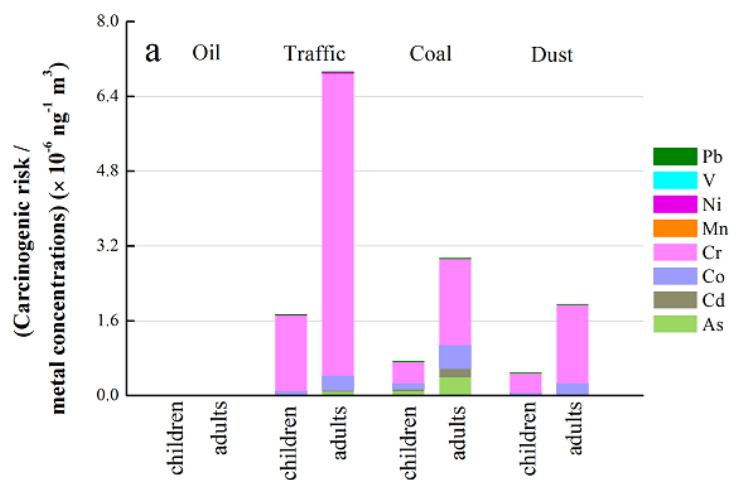

247

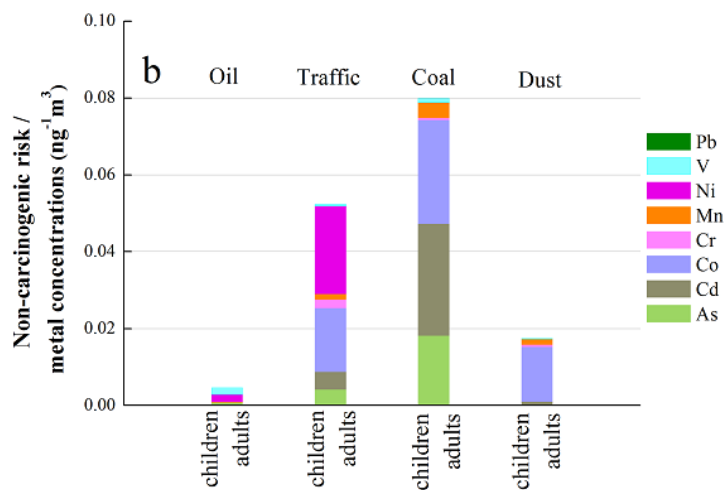

248

249

**Figure S6.** The normalized health risk of toxic elements (As, Cd, Co, Cr (VI), Mn, Ni, V and Pb) in four emission sources.

250

251

252 **References**

- 253 (1) Li, H. M.; Wang, J. H.; Wang, Q. G.; Qian, X.; Qian, Y.; Yang, M.; Li, F. Y.; Lu, H.;  
254 Wang, C. Chemical fractionation of arsenic and heavy metals in fine particle matter and its  
255 implications for risk assessment: A case study in Nanjing, China. *Atmospheric Environment*  
256 **2015**, *103*, 339-346.
- 257 (2) Li, H. M.; Wang, Q. G.; Shao, M.; Wang, J. H.; Wang, C.; Sun, Y. X.; Qian, X.; Wu, H. F.;  
258 Yang, M.; Li, F. Y. Fractionation of airborne particulate-bound elements in haze-fog episode  
259 and associated health risks in a megacity of southeast China. *Environmental Pollution* **2016**,  
260 *208*, 655-662.
- 261 (3) Polissar, A. V.; Hopke, P. K.; Paatero, P.; Malm, W. C.; Sisler, J. F. Atmospheric aerosol  
262 over Alaska: 2. Elemental composition and sources. *Journal of Geophysical Research:*  
263 *Atmospheres* **1998**, *103* (D15), 19045-19057.
- 264 (4) Tan, J. H.; Duan, J. C.; Chai, F. H.; He, K. B.; Hao, J. M. Source apportionment of size  
265 segregated fine/ultrafine particle by PMF in Beijing. *Atmospheric Research* **2014**, *139*,  
266 90-100.
- 267 (5) Volckens, J.; Leith, D. Partitioning theory for respiratory deposition of semivolatile  
268 aerosols. *Annals of Occupational Hygiene* **2003**, *47* (2), 157-164.
- 269 (6) US EPA (U.S. Environmental Protection Agency), 2009. Risk Assessment Guidance for  
270 Superfund (RAGS), Volume I Human Health Evaluation Manual (Part F, Supplemental  
271 Guidance for Inhalation Risk Assessment). EPA-540-R-070-002, OSWER 9285.7-82, January.  
272 <http://www.epa.gov/swerrims/riskassessment/ragsf/index.htm>.
- 273 (7) US EPA (U.S. Environmental Protection Agency), 2013. User's Guide/technical  
274 Background Document for US EPA Region 9's RSL (Regional Screening Levels) Tables.  
275 <http://www.epa.gov/region9/superfund/prg/>.
- 276 (8) Taner, S.; Pekey, B.; Pekey, H. Fine particulate matter in the indoor air of barbeque  
277 restaurants: elemental compositions, sources and health risks. *Science of the total environment*  
278 **2013**, *454-455*, 79-87.
- 279 (9) US EPA (U.S. Environmental Protection Agency), 1998. Risk Assessment Guidance for  
280 Superfund. In: Human Health Evaluation Manual (Part D), vol. I.  
281 <https://www.epa.gov/risk/risk-assessment-guidance-superfund-rags-part-d>.
